# Supplementary material for: Genetic alterations analysis in prognostic stratified groups identified TP53 and ARID1A as poor clinical performance markers in intrahepatic cholangiocarcinoma
Source: PubMed Central journal article supplement (PMC5940669; doi:10.1038/s41598-018-25669-1), 2018-05-08
Supplement: 41598_2018_25669_MOESM1_ESM.pdf [file 41598_2018_25669_MOESM1_ESM.pdf]

– Supplementary Information –

**Genetic alterations analysis in prognostic stratified groups identified *TP53* and *ARID1A* as poor clinical performance markers in intrahepatic cholangiocarcinoma**

Michele Simbolo<sup>1,2</sup>, Caterina Vicentini<sup>1,2</sup>, Andrea Ruzzenente<sup>3</sup>, Matteo Brunelli<sup>2</sup>, Simone Conci<sup>3</sup>, Matteo Fassan<sup>1°</sup>, Andrea Mafficini<sup>1</sup>, Borislav Rusev<sup>1,2</sup>, Vincenzo Corbo<sup>1,2</sup>, Paola Capelli<sup>2</sup>, Emilio Bria<sup>4</sup>, Serena Pedron<sup>2</sup>, Giona Turri<sup>2</sup>, Rita T. Lawlor<sup>1,2</sup>, Giampaolo Tortora<sup>4</sup>, Claudio Bassi<sup>5</sup>, Alfredo Guglielmi<sup>3</sup>, Aldo Scarpa<sup>1,2</sup>

<sup>1</sup> ARC-Net Research Centre, University and Hospital Trust of Verona, Verona, Italy

<sup>2</sup> Department of Diagnostics and Public Health, Section of Anatomical Pathology, University and Hospital Trust of Verona, Verona, Italy

<sup>3</sup> Department of Surgery, General and Hepatobiliary Surgery, University Hospital G.B. Rossi, University of Verona

<sup>4</sup> Department of Medicine, U.O.C Oncology, University and Hospital Trust of Verona, Verona, Italy

<sup>5</sup> Department of Surgery and Oncology, Pancreas Institute, University of Verona, Verona, Italy

° Present address: Department of Medicine (DIMED), Surgical Pathology and Cytopathology Unit, University of Padua, Padua, Italy

Correspondence to: Prof Emilio Bria, MD, Department of Medicine, U.O.C Oncology, University and Hospital Trust of Verona, Verona, Italy Piazzale L.A. Scuro, 10, Tel.: +390458128124, fax: +390458027410, email: [emilio.bria@univr.it](mailto:emilio.bria@univr.it)

Supplementary Figures: 3

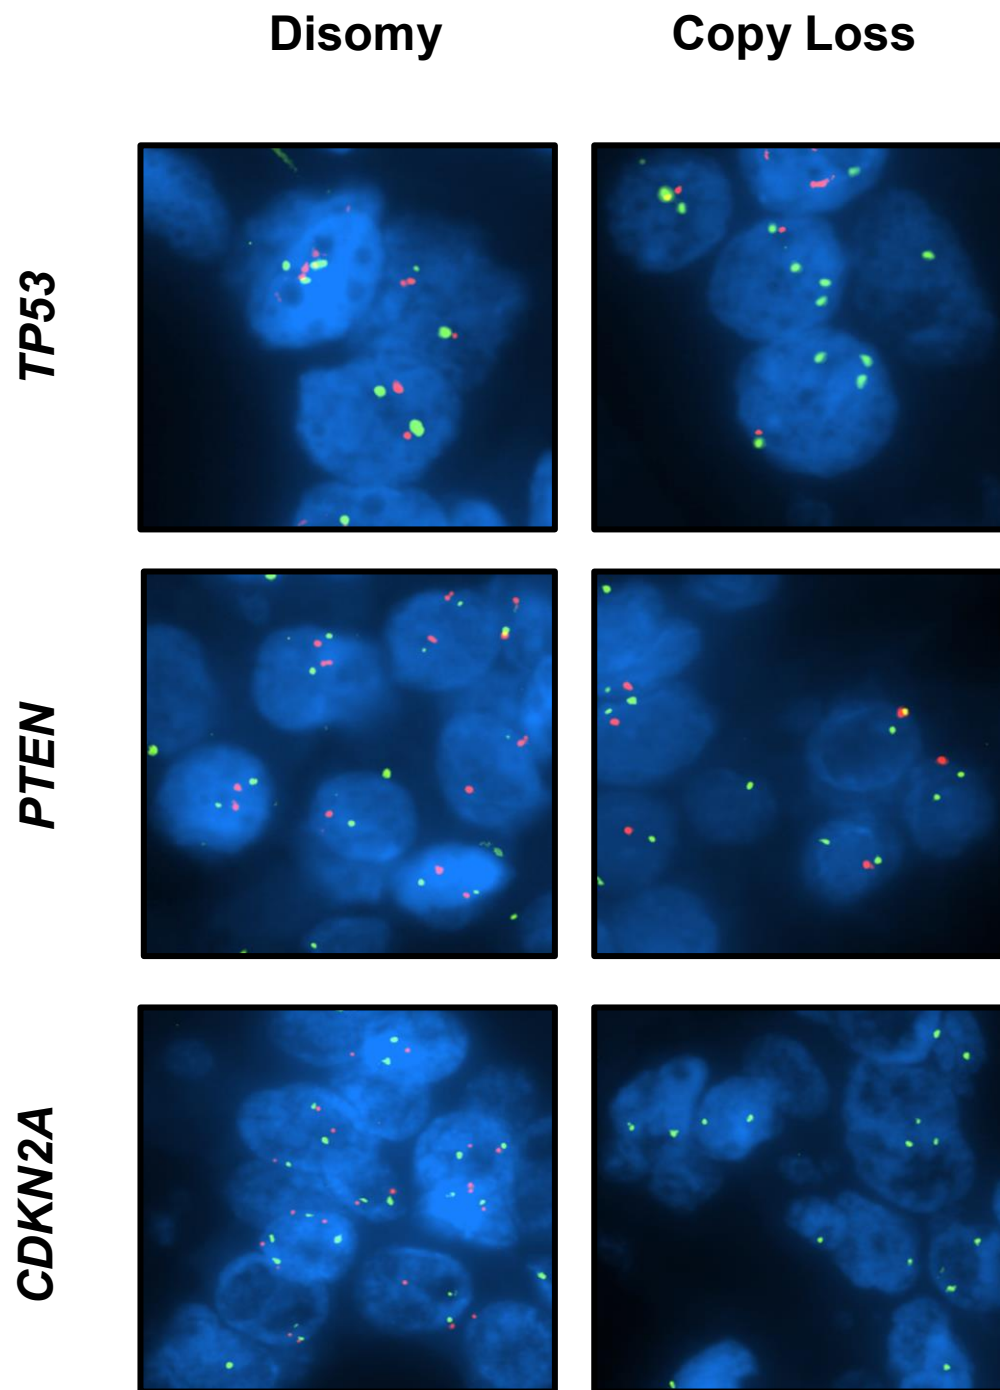

**Supplementary Figure S1: FISH validation of copy number variations.** Representative cases affected by loss of one or both gene copies of **A) *TP53***, **B) *PTEN*** and **C) *CDKN2A*** are illustrated and compared to cases showing disomy for the same target.

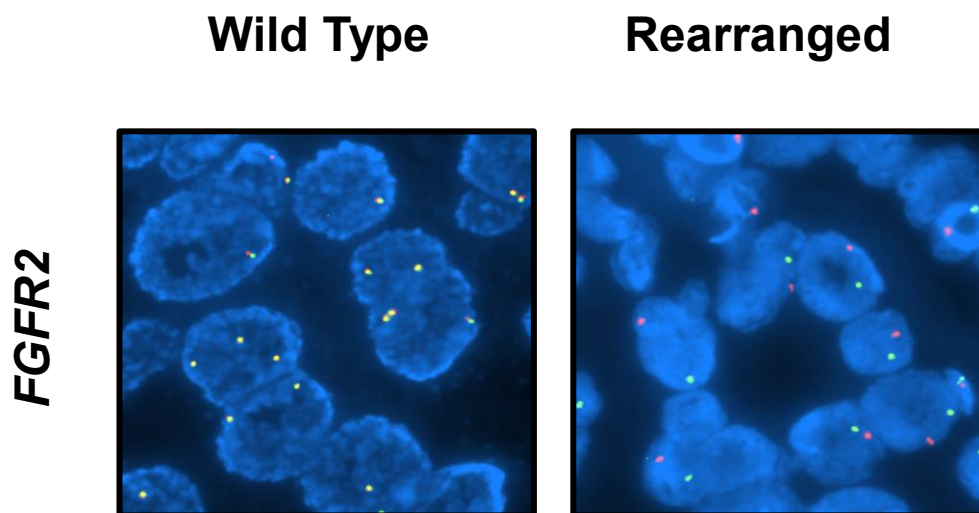

**Supplementary Figure S2: Representative image of *FGFR2* rearrangement.** Representative images of a wild-type (left) intrahepatic cholangiocarcinoma with Intact FISH probes (yellow colour), and of the rearranged (right) case with split FISH probes (red/green colours).

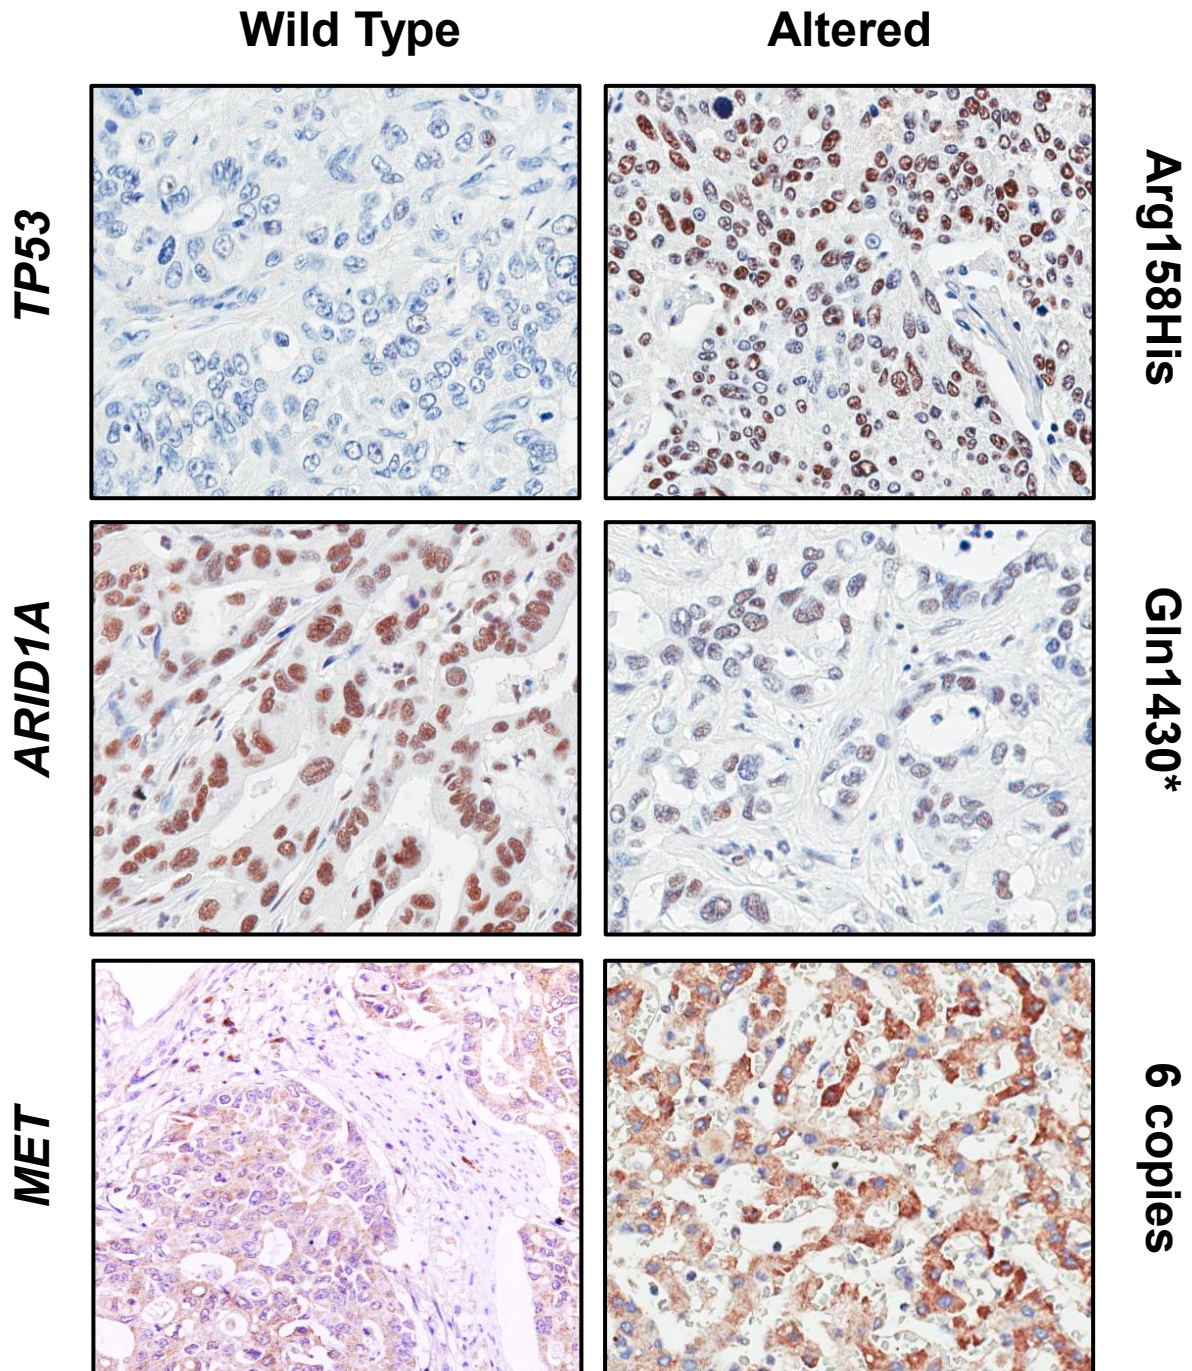

**Supplementary Figure S3: Immunohistochemical analysis.** Representative cases with no alteration in genes evaluated on the left while three cases characterized by alterations (mutation of *TP53* and *ARID1A* and copy gain of *MET*) on the right. The specific alteration affecting each case is reported on the right.
